# Supplementary material
Source: PubMed Central journal article supplement (PMC3697249)
Supplement: JB.02152-12_zjb999092643so1.pdf [file JB.02152-12_zjb999092643so1.pdf]

Table S1. List of genes that were down-regulated in the *virX* mutant TS186

| CPE#    | gene         | product                                     | Fold<br>change<br>(log2) | t-test<br>p-value |
|---------|--------------|---------------------------------------------|--------------------------|-------------------|
| CPE0168 | <i>arcA</i>  | arginine deiminase                          | -3.95                    | 3.49E-04          |
| CPE0169 | <i>arcB</i>  | ornithine carbamoyl transferase             | -3.74                    | 1.04E-03          |
| CPE0170 | <i>arcD</i>  | arginine ornithine antiporter               | -4.30                    | 6.92E-04          |
| CPE0171 | <i>arcC</i>  | carbamate kinase                            | -4.02                    | 4.57E-04          |
| CPE0172 | <i>argR</i>  | arginine repressor                          | -2.33                    | 3.45E-03          |
| CPE0173 | <i>colA</i>  | collagenase (kappa-toxin)                   | -1.73                    | 6.03E-04          |
| CPE0299 | <i>ftsE</i>  | cell-division ATP-binding protein ftsE      | -1.60                    | 5.25E-04          |
| CPE0300 | <i>ftsX</i>  | cell-division protein ftsX                  | -1.62                    | 1.15E-03          |
| CPE0494 |              | probable NDP-suger dehydrogenase            | -1.97                    | 1.34E-05          |
| CPE0659 |              | conserved hypothetical protein              | -1.79                    | 4.01E-04          |
| CPE0821 |              | PTS system, mannose-specific component IIAB | -2.27                    | 6.52E-04          |
| CPE0822 |              | PTS system, mannose-specific component IIC  | -2.24                    | 9.28E-04          |
| CPE0823 |              | PTS system, mannose-specific component IID  | -2.29                    | 2.13E-03          |
| CPE0824 |              | PTS system, mannose-specific component IID  | -1.90                    | 2.00E-04          |
| CPE0892 |              | NADPH-dependent butanol dehydrogenase       | -2.09                    | 8.41E-03          |
| CPE0897 | <i>eutA</i>  | ethanolamine utilization protein            | -2.06                    | 4.48E-02          |
| CPE0898 | <i>eutB</i>  | ethanolamine ammonia lyase heavy chain      | -2.37                    | 1.34E-02          |
| CPE0899 | <i>eutC</i>  | ethanolamine ammonia lyase light chain      | -2.52                    | 1.61E-02          |
| CPE0900 | <i>eutL</i>  | ethanolamine utilization protein            | -2.43                    | 1.17E-02          |
| CPE0901 | <i>pduJ</i>  | propanediol utilization protein             | -2.50                    | 1.55E-02          |
| CPE0902 | <i>adhE</i>  | probable alcohol dehydrogenase              | -3.02                    | 1.11E-02          |
| CPE0903 | <i>pduJ2</i> | propanediol utilization protein             | -1.72                    | 2.16E-02          |
| CPE0904 | <i>eutT</i>  | cobalamin adenosyltransferase               | -2.64                    | 1.35E-02          |
| CPE0905 | <i>pduL</i>  | propanediol utilization protein             | -2.12                    | 2.07E-02          |
| CPE0906 |              | hypothetical protein                        | -2.51                    | 1.49E-02          |
| CPE0908 | <i>pduT</i>  | propanediol utilization protein             | -1.89                    | 4.67E-02          |
| CPE0909 | <i>eutH</i>  | ethanolamine utilization protein            | -2.34                    | 1.68E-02          |
| CPE0910 | <i>eutQ</i>  | ethanolamine utilization protein            | -1.77                    | 1.82E-02          |

|         |              |                                                               |       |          |
|---------|--------------|---------------------------------------------------------------|-------|----------|
| CPE1041 |              | ABC transporter SBP (ferric ion importer)                     | -1.64 | 8.21E-05 |
| CPE1092 | <i>pac</i>   | probable penicillin acylase                                   | -2.41 | 9.11E-05 |
| CPE1358 |              | hypothetical protein                                          | -1.79 | 4.51E-03 |
| CPE1430 | <i>clsD</i>  | cardiolipin synthase                                          | -1.92 | 1.13E-03 |
| CPE1497 |              | conserved hypothetical protein                                | -1.71 | 3.49E-03 |
| CPE1512 | <i>reeS</i>  | two-component sensor kinase/regulator                         | -2.05 | 1.44E-04 |
| CPE1518 | <i>gdhA</i>  | NADP-specific glutamate dehydrogenase                         | -1.55 | 7.39E-04 |
| CPE1604 |              | probable multidrug-efflux transporter                         | -1.93 | 7.06E-04 |
| CPE1795 |              | nitrate reductase NADH oxydase subunit                        | -1.61 | 4.03E-04 |
| CPE1815 | <i>recN</i>  | DNA repair and recombination protein recN                     | -2.20 | 5.18E-04 |
| CPE1819 |              | 1-deoxyxylulose-5-phosphate synthase                          | -1.77 | 1.27E-04 |
| CPE1907 | <i>patA</i>  | probable aspartate aminotransferase                           | -1.72 | 9.58E-04 |
| CPE1926 |              | two-component sensor histidine kinase                         | -2.06 | 1.09E-04 |
| CPE1991 |              | conserved hypothetical protein                                | -1.80 | 6.37E-05 |
| CPE2276 |              | inositol-monophosphate dehydrogenase                          | -1.73 | 1.33E-04 |
| CPE2285 |              | probable pilin biogenesis protein                             | -1.70 | 6.80E-05 |
| CPE2286 |              | probable pilin biogenesis protein                             | -2.01 | 9.54E-04 |
| CPE2310 | <i>aldH</i>  | aldehyde dehydrogenase                                        | -2.01 | 2.24E-04 |
| CPE2317 |              | probable Na <sup>+</sup> /H <sup>+</sup> antiporter, putative | -1.77 | 9.21E-03 |
| CPE2331 |              | two-component sensor histidine kinase                         | -1.68 | 2.98E-03 |
| CPE2424 |              | tRNA/rRNA methyltransferase                                   | -1.71 | 1.80E-03 |
| CPE2528 |              | conserved hypothetical protein                                | -1.75 | 1.40E-03 |
| CPE2615 |              | conserved hypothetical protein                                | -1.87 | 3.86E-04 |
| CPE2623 | <i>sdhB2</i> | L-serine dehydratase, beta subunit                            | -2.07 | 1.04E-05 |
| CPE2654 | <i>gidA</i>  | glucose-inhibited division protein GidA                       | -1.51 | 1.32E-05 |

---

The microarray experiment was carried out according to the method employed previously (Ohtani et al, Anaerobe, 2010). The microarray experiments were performed four times at 3 h from the start of culture, The 4 data sets were statistically analyzed by GeneSpring GX software. To find the gene whose mean log<sub>2</sub> expression ratio is significantly different from the all genes, we performed the Welch t-test intending for use with two samples having possibly unequal variances. T-values are calculated for each gene, and p-values are directly calculated from the theoretical t-distribution based on the gene's calculated t-value. Significantly differentially expressed genes were selected by using a p-value threshold of 0.05. Finally, the log<sub>2</sub> expression ratio was standardized to normal distribution, and the genes showing significant differences in expression ( $<-1.5 \sigma$ ) were picked up.
