# Supplementary material
Source: PubMed Central journal article supplement (PMC3697249)
Supplement: JB.02152-12_zjb999092643so2.pdf [file JB.02152-12_zjb999092643so2.pdf]

Table S2. List of genes that were up-regulated in the *virX* mutant TS186

| CPE#    | Gene        | Product                                             | Fold change (log2) | t-test p-value |
|---------|-------------|-----------------------------------------------------|--------------------|----------------|
| CPE0033 |             | hypothetical protein                                | 2.62               | 3.17E-05       |
| CPE0052 |             | hypothetical protein                                | 1.64               | 1.38E-03       |
| CPE0068 | <i>glgC</i> | glucose-1-phosphate adenylyltransferase             | 3.66               | 2.59E-04       |
| CPE0069 | <i>glgD</i> | glycogen biosynthesis protein glgD                  | 3.19               | 2.85E-04       |
| CPE0070 |             | conserved hypothetical protein                      | 2.99               | 8.25E-05       |
| CPE0113 |             | hypothetical protein                                | 1.86               | 9.30E-03       |
| CPE0114 |             | hypothetical protein                                | 2.40               | 1.31E-02       |
| CPE0125 |             | hypothetical protein                                | 1.81               | 8.82E-03       |
| CPE0126 |             | hypothetical protein                                | 2.05               | 1.85E-02       |
| CPE0127 |             | hypothetical protein                                | 1.56               | 6.52E-03       |
| CPE0130 |             | hypothetical protein                                | 2.80               | 2.92E-04       |
| CPE0134 |             | hypothetical protein                                | 2.76               | 1.24E-04       |
| CPE0138 |             | phage-related hypothetical protein                  | 1.77               | 6.12E-04       |
| CPE0191 | <i>nagH</i> | hyaluronidase (Mu-toxin)                            | 3.40               | 4.09E-04       |
| CPE0203 |             | hypothetical protein                                | 1.57               | 8.14E-03       |
| CPE0206 |             | hypothetical protein                                | 3.30               | 7.58E-04       |
| CPE0209 |             | hypothetical protein                                | 1.58               | 7.27E-04       |
| CPE0222 |             | sortase                                             | 1.72               | 2.69E-03       |
| CPE0230 |             | hypothetical protein                                | 1.96               | 3.20E-03       |
| CPE0237 | <i>napA</i> | probable Na <sup>+</sup> /H <sup>+</sup> antiporter | 2.92               | 4.89E-04       |
| CPE0258 |             | probable transcriptional regulator                  | 2.40               | 2.77E-04       |
| CPE0357 |             | hypothetical protein                                | 1.92               | 5.58E-05       |
| CPE0383 |             | conserved hypothetical protein                      | 1.58               | 4.62E-03       |
| CPE0428 |             | hypothetical protein                                | 3.06               | 1.77E-05       |
| CPE0466 |             | hypothetical protein                                | 1.55               | 2.11E-02       |
| CPE0522 |             | conserved hypothetical protein                      | 2.15               | 1.41E-03       |
| CPE0553 | <i>nanJ</i> | exo-alpha-sialidase                                 | 4.10               | 3.98E-04       |
| CPE0554 |             | hypothetical protein                                | 4.33               | 3.23E-04       |

|         |             |                                     |      |          |
|---------|-------------|-------------------------------------|------|----------|
| CPE0576 |             | ABC transporter SBP                 | 3.19 | 2.08E-04 |
| CPE0577 |             | ABC transporter MSD                 | 2.54 | 6.95E-05 |
| CPE0578 |             | ABC transporter MSD                 | 2.12 | 3.46E-04 |
| CPE0645 | <i>gltX</i> | glutamine--tRNA ligase              | 5.17 | 1.87E-04 |
| CPE0802 |             | hypothetical protein                | 3.45 | 8.14E-05 |
| CPE0818 |             | endo-beta-N-acetylglucosaminidase   | 4.60 | 1.79E-04 |
| CPE0867 |             | hypothetical protein                | 2.11 | 1.07E-03 |
| CPE0925 |             | hypothetical protein                | 1.77 | 9.67E-04 |
| CPE0938 |             | hypothetical protein                | 1.92 | 4.12E-05 |
| CPE0952 |             | hypothetical protein                | 1.51 | 7.21E-04 |
| CPE1023 |             | hypothetical protein                | 1.53 | 2.43E-04 |
| CPE1024 |             | hypothetical protein                | 1.76 | 8.47E-04 |
| CPE1066 |             | deoxycytidylate deaminase           | 2.75 | 4.23E-04 |
| CPE1072 | <i>accB</i> | acetyl-CoA carboxylase              | 2.66 | 5.83E-05 |
| CPE1077 |             | hypothetical protein                | 1.67 | 1.65E-04 |
| CPE1081 |             | conserved hypothetical protein      | 2.15 | 6.32E-05 |
| CPE1109 |             | hypothetical protein                | 2.57 | 1.67E-04 |
| CPE1111 |             | hypothetical protein                | 1.61 | 2.14E-04 |
| CPE1113 |             | hypothetical protein                | 2.34 | 2.58E-05 |
| CPE1125 |             | hypothetical protein, phage-related | 1.60 | 3.14E-03 |
| CPE1135 |             | hypothetical protein                | 2.09 | 4.43E-04 |
| CPE1136 |             | hypothetical protein                | 2.72 | 6.61E-04 |
| CPE1143 |             | hypothetical protein                | 2.40 | 1.55E-03 |
| CPE1145 | <i>citG</i> | CitG protein                        | 1.54 | 7.65E-02 |
| CPE1164 |             | hypothetical protein                | 3.33 | 1.14E-05 |
| CPE1212 | <i>uraA</i> | probable uracil permease            | 2.02 | 1.45E-03 |
| CPE1213 |             | hypothetical protein                | 1.62 | 1.70E-04 |
| CPE1214 |             | conserved hypothetical protein      | 2.01 | 6.94E-04 |
| CPE1234 | <i>nagJ</i> | hyaluronidase (Mu-toxin)            | 3.79 | 4.82E-04 |
| CPE1235 |             | hypothetical protein                | 1.82 | 4.68E-03 |
| CPE1266 |             | beta-galactosidase                  | 3.14 | 3.41E-04 |
| CPE1280 |             | hypothetical protein                | 3.04 | 2.27E-05 |

|         |               |                                            |      |          |
|---------|---------------|--------------------------------------------|------|----------|
| CPE1341 |               | ABC transporter SBP (galactoside importer) | 6.89 | 2.23E-04 |
| CPE1342 |               | ABC transporter NBD (galactoside importer) | 6.47 | 7.20E-05 |
| CPE1343 |               | ABC transporter MSD (galactoside importer) | 6.33 | 4.99E-05 |
| CPE1353 |               | hypothetical protein                       | 2.74 | 6.88E-04 |
| CPE1364 |               | conserved hypothetical protein             | 1.77 | 1.49E-03 |
| CPE1371 |               | sodium-/chloride-dependent transporter     | 1.57 | 2.52E-03 |
| CPE1376 |               | hypothetical protein                       | 1.67 | 1.87E-04 |
| CPE1499 | <i>comEC</i>  | probable late competence protein           | 2.01 | 3.26E-05 |
| CPE1511 |               | hypothetical protein                       | 1.52 | 1.18E-04 |
| CPE1515 |               | hypothetical protein                       | 2.08 | 8.35E-03 |
| CPE1523 | <i>nagL</i>   | hyaluronidase (Mu-toxin)                   | 4.58 | 2.10E-03 |
| CPE1564 |               | conserved hypothetical protein             | 1.61 | 1.18E-03 |
| CPE1584 |               | hypothetical protein                       | 1.66 | 3.46E-04 |
| CPE1586 |               | hypothetical protein                       | 2.86 | 6.67E-05 |
| CPE1591 |               | conserved hypothetical protein             | 1.62 | 2.63E-03 |
| CPE1595 |               | probable thioredoxin                       | 1.77 | 7.84E-05 |
| CPE1663 |               | conserved hypothetical protein             | 4.35 | 6.22E-04 |
| CPE1734 | <i>rpmB</i>   | probable 50S ribosomal protein L28         | 1.50 | 1.27E-03 |
| CPE1749 |               | conserved hypothetical protein             | 1.58 | 1.35E-05 |
| CPE1753 | <i>spoIVA</i> | stage IV sporulation protein A             | 3.02 | 8.74E-04 |
| CPE1761 | <i>sigG</i>   | RNA polymerase sigma-G factor              | 2.00 | 1.06E-04 |
| CPE1762 | <i>sigE</i>   | RNA polymerase sigma-E factor              | 3.28 | 2.64E-04 |
|         |               | <i>spoIIG</i>                              |      |          |
| CPE1763 | <i>A</i>      | sporulation protein spoIIGA                | 2.98 | 1.16E-03 |
| CPE1782 |               | hypothetical protein                       | 1.72 | 3.67E-04 |
| CPE1812 | <i>spo0A</i>  | transcription factor Spo0A                 | 2.23 | 1.12E-03 |
| CPE1875 |               | conserved hypothetical protein             | 2.14 | 1.49E-03 |
| CPE1876 |               | conserved hypothetical protein             | 2.63 | 3.34E-03 |
| CPE1949 |               | hypothetical protein                       | 1.63 | 2.72E-02 |
| CPE2005 |               | conserved hypothetical protein             | 1.56 | 5.03E-03 |
| CPE2048 | <i>sigF</i>   | RNA polymerase sigma-F factor              | 4.53 | 6.72E-04 |
| CPE2049 | <i>spoIIA</i> | anti-sigma F factor antagonist             | 4.61 | 1.29E-04 |

| <i>B</i>      |               |                                              |      |          |
|---------------|---------------|----------------------------------------------|------|----------|
| <i>spoIIA</i> |               |                                              |      |          |
| CPE2050       | <i>A</i>      | anti-sigma F factor antagonist               | 4.41 | 5.62E-05 |
| CPE2146       |               | hypothetical protein                         | 4.53 | 4.48E-04 |
| CPE2182       |               | conserved hypothetical protein               | 2.23 | 1.73E-02 |
| CPE2215       |               | hypothetical protein                         | 2.44 | 2.34E-03 |
| CPE2261       |               | hypothetical protein                         | 2.82 | 1.38E-03 |
| CPE2262       |               | hypothetical protein                         | 3.07 | 9.36E-04 |
| CPE2263       |               | hypothetical protein (sortase substrate)     | 3.70 | 8.51E-04 |
| CPE2288       |               | prepilin peptidase dependent protein A       | 1.56 | 2.08E-02 |
| CPE2295       | <i>lepW</i>   | signal peptidase type I                      | 2.92 | 1.69E-04 |
| CPE2364       |               | TCS27, two-component response regulator      | 1.52 | 5.56E-03 |
| CPE2470       | <i>ftsH2</i>  | probable cell-division protein ftsH          | 1.75 | 5.15E-04 |
|               |               | hypoxanthine-guanine                         |      |          |
| CPE2471       | <i>hprT2</i>  | phosphoribosyltransferase                    | 1.84 | 1.20E-03 |
| CPE2472       |               | probable cell-cycle protein                  | 2.79 | 1.48E-03 |
| CPE2473       | <i>spoIIE</i> | stage II sprulation protein E                | 5.40 | 2.06E-04 |
| CPE2511       | <i>fer2</i>   | ferredoxin [3Fe-4S]-like protein             | 1.71 | 8.97E-04 |
| CPE2625       |               | tagatose-6-phosphate aldose/ketose isomerase | 1.54 | 3.33E-02 |
|               |               | PTS system,, mannose-specific, component     |      |          |
| CPE2632       |               | IIAB                                         | 1.76 | 4.51E-04 |

The Microarra experiment was carried out according to the method employed previously (Ohtani et al, Anaerobe, 2010). The microarray experiments were performed four times at 3 h from the start of culture, The 4 data sets were statistically analyzed by GeneSpring GX software. To find the gene whose mean log<sub>2</sub> expression ratio is significantly different from the all genes, we performed the Welch t-test intending for use with two samples having possibly unequal variances. T-values are calculated for each gene, and p-values are directly calculated from the theoretical t-distribution based on the gene's calculated t-value. Significantly differentially expressed genes were selected by using a p-value threshold of 0.05. Finally, the log<sub>2</sub> expression ratio was standardized to normal distribution, and the genes showing significant differences in expression (>1.5  $\sigma$ ) were picked up.
