# Supplementary material
Source: PubMed Central journal article supplement (PMC3697249)
Supplement: JB.02152-12_zjb999092643so4.pdf [file JB.02152-12_zjb999092643so4.pdf]

Fig. S1

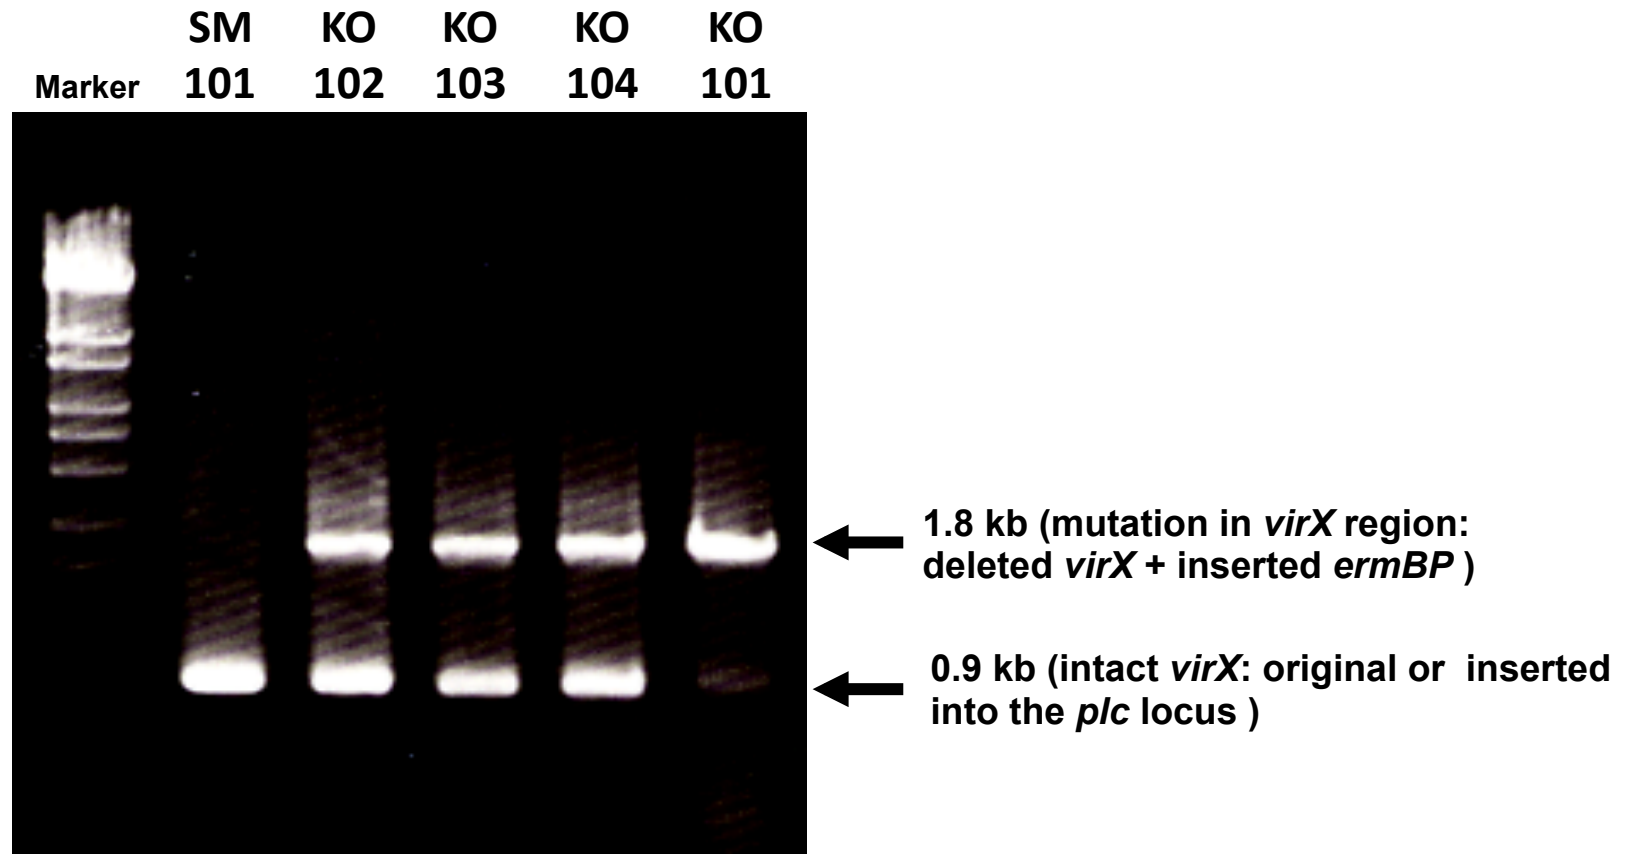

**Fig. S1. Confirmation of mutation and complementation of SM101 derivatives.** Results are shown from PCR against total DNA from SM101 (wild type), KO101 (*virX* mutant), KO102 (KO101 complemented with intact *virX*), KO103 (KO101 complemented with mutated *virX* (K4Stop) ), KO104 (KO101 complemented with mutated *virX* (K42Stop) ) using primer *virX*-detect 1 (5'-TTAGCCGCTAAGAATGCCTATACC-3') and *virX*-detect 2 (5'-GTTTGATGAGTGCTCAGCAT-3').

Note that SM101 has only intact *virX*, KO101 has a insertion mutation in the *virX* locus with *ermBP*, and KO102, 103, 104 have intact *virX* insertions into the *plc* locus in addition to KO101.
